# Supplementary material for: Luminescent 1H-1,3-benzazaphospholes
Source: Royal Society of Chemistry journal article supplement (doi:10.1039/d2ra07226b), 2022-12-22

## Luminescent 1*H*-1,3-benzazaphospholes

Sloane Evariste,<sup>a</sup> Alexandra M. Harrison,<sup>a</sup> Sunandan Sarkar,<sup>b</sup> Arnold L. Rheingold,<sup>c</sup> Barry D. Dunietz,<sup>b</sup> Joachim Heinicke,<sup>e</sup> Emalyn Delgado Rosario,<sup>a</sup> Sungwoon Yoon,<sup>f</sup> Thomas S. Teets,<sup>f</sup> and John D. Protasiewicz<sup>a,\*</sup>

- a.* Department of Chemistry, Case Western Reserve University, Cleveland, Ohio 44106, United States  
*b.* Department of Chemistry, National Institute of Technology Tiruchirappalli, Tiruchirappalli, Tamil Nadu 620015, India  
*c.* Department of Chemistry and Biochemistry, University of California, San Diego, La Jolla, California 92093, United States  
*d.* Department of Chemistry and Biochemistry, Kent State university, Kent, Ohio 44242, United States  
*e.* Institut für Biochemie, Anorganische Chemie, Ernst-Moritz-Arndt-Universität Greifswald, Felix-Hausdorff-Str. 4, D-17489, Greifswald, Germany.  
*f.* University of Houston, Department of Chemistry, 3585 Cullen Blvd. Room 112, Houston, TX 77204-5003

## Supporting Information

### Table of Contents

#### A. NMR Characterization

**Figure S1.** <sup>1</sup>H NMR spectrum of **3c**

**Figure S2.** <sup>13</sup>C{<sup>1</sup>H} NMR spectrum of **3c**

**Figure S3.** <sup>31</sup>P{<sup>1</sup>H} NMR spectrum of **3c**

#### B. Crystallographic Information

**Tables S1-S5.** Crystal data and structure refinement at 100 K, and geometrical details for **3c**

**Figure S4.** Detailed packing diagram for **3c**

#### C. Computational Studies

**Table S5.** Optimized cartesian coordinates of **3a**

**Table S6.** Optimized cartesian coordinates of **3b**

**Table S8.** Optimized cartesian coordinates of **3c**

**Table S9.** Optimized cartesian coordinates of **3a** (S1 state)

**Table S10.** Optimized cartesian coordinates of **3b** (S1 state)

**Table S11.** Optimized cartesian coordinates of **3c** (S1 state)

**Figure S5.** Comparison of key calculated bond distances in ground state and first excited states of **3b** and **3c**

#### **D. Optical & Lifetime Measurements**

**Figure S6.** (a) UV-vis spectra as a function of concentration (b) plot of Abs vs concentration for **3b**

**Figure S7.** (a) UV-vis spectra as a function of concentration (b) plot of Abs vs concentration for **3c**

**Figure S8.** (a) Excitation and emission spectra for **3b** (b) Excitation and emission spectra for **3c**

**Figure S9.** (a) Fluorescence spectra as a function of concentration for **3b** (b) plot of Fluorescence intensity vs concentration for **3b**

**Figure S10.** (a) Fluorescence spectra as a function of concentration for **3c** (b) plot of Fluorescence intensity vs concentration for **3c**

**Figure S11.** Fluorescence spectra for **3c** in different solvents

**Figure S12.** (a) Lifetime data for **3b** (b) Lifetime data for **3c**

### A. NMR Characterization

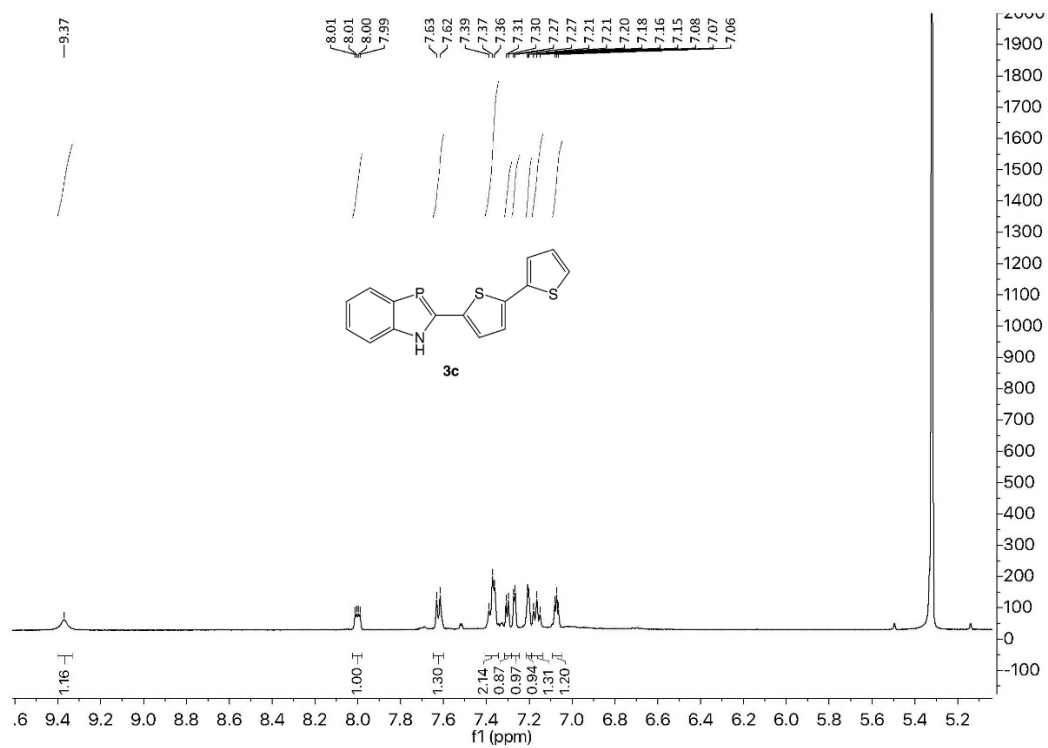

Figure S1. <sup>1</sup>H NMR spectrum of derivative **3c** in CD<sub>2</sub>Cl<sub>2</sub>, 500 MHz.

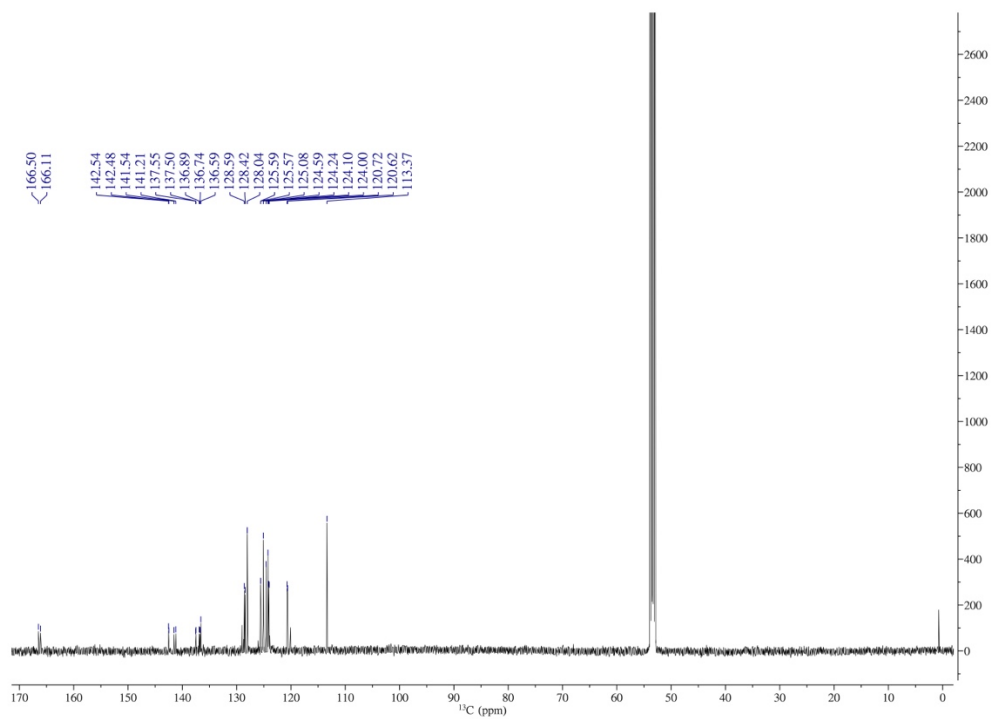

Figure S2. <sup>13</sup>C{<sup>1</sup>H} NMR spectrum of derivative **3c** in CD<sub>2</sub>Cl<sub>2</sub>, 126 MHz.

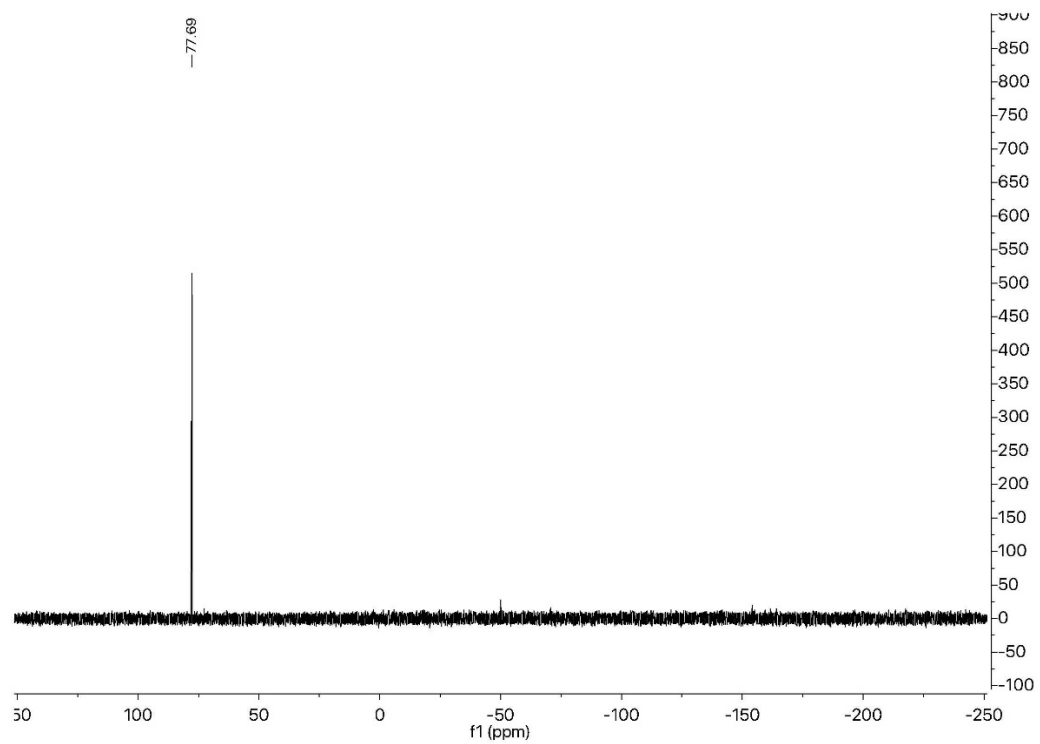

**Figure S3.**  $^{31}\text{P}\{^1\text{H}\}$  NMR spectrum of derivative **3c** in  $\text{CD}_2\text{Cl}_2$ , 202 MHz.

## B. Crystallographic Information & Results

**Table S1. Crystal data and structure refinement at 100 K for derivative 3c.**

|                                        |                                                                |                                                                               |
|----------------------------------------|----------------------------------------------------------------|-------------------------------------------------------------------------------|
| Empirical formula                      | C <sub>15</sub> H <sub>10</sub> N P S <sub>2</sub>             |                                                                               |
| Formula weight                         | 299.33                                                         |                                                                               |
| Temperature                            | 100.0 K                                                        |                                                                               |
| Wavelength                             | 1.54178 Å                                                      |                                                                               |
| Crystal system                         | Monoclinic                                                     |                                                                               |
| Space group                            | P 2 <sub>1</sub>                                               |                                                                               |
| Unit cell dimensions                   | $a = 8.1771(4)$ Å<br>$b = 5.7977(3)$ Å<br>$c = 13.7003(7)$ Å   | $\alpha = 90^\circ$ .<br>$\beta = 90.684(4)^\circ$ .<br>$\gamma = 90^\circ$ . |
| Volume                                 | $649.46(6)$ Å <sup>3</sup>                                     |                                                                               |
| Z                                      | 2                                                              |                                                                               |
| Density (calculated)                   | 1.531 Mg/m <sup>3</sup>                                        |                                                                               |
| Absorption coefficient<br>F(000)       | $4.726$ mm <sup>-1</sup><br>308                                |                                                                               |
| Crystal size                           | $0.28 \times 0.05 \times 0.03$ mm <sup>3</sup>                 |                                                                               |
| Theta range for data collection        | $3.226$ to $66.981^\circ$ .                                    |                                                                               |
| Index ranges                           | $-9 \leq h \leq 9$ , $-6 \leq k \leq 6$ , $-16 \leq l \leq 15$ |                                                                               |
| Reflections collected                  | 2535                                                           |                                                                               |
| Independent reflections                | 1814 [R(int) = 0.0310]                                         |                                                                               |
| Completeness to theta = $66.981^\circ$ | 96.2 %                                                         |                                                                               |
| Absorption correction                  | Semi-empirical from equivalents                                |                                                                               |
| Max. and min. transmission             | 0.3207 and 0.1886                                              |                                                                               |
| Refinement method                      | Full-matrix least-squares on F <sup>2</sup>                    |                                                                               |
| Data / restraints / parameters         | 1814 / 71 / 185                                                |                                                                               |
| Goodness-of-fit on F <sup>2</sup>      | 1.058                                                          |                                                                               |
| Final R indices [I > 2σ(I)]            | R1 = 0.0407, wR2 = 0.1011                                      |                                                                               |
| R indices (all data)                   | R1 = 0.0442, wR2 = 0.1034                                      |                                                                               |
| Absolute structure parameter           | 0.16(2)                                                        |                                                                               |
| Extinction coefficient                 | n/a                                                            |                                                                               |
| Largest diff. peak and hole            | $0.379$ and $-0.310$ e.Å <sup>-3</sup>                         |                                                                               |

**Table S2.** Atomic coordinates ( $\times 10^4$ ) and equivalent isotropic displacement parameters ( $\text{\AA}^2 \times 10^3$ ) for 3c.  $U(\text{eq})$  is defined as one third of the trace of the orthogonalized  $U^{ij}$  tensor.

|       | x         | y         | z        | $U(\text{eq})$ |
|-------|-----------|-----------|----------|----------------|
| S(1)  | 5319(4)   | 3628(3)   | 8644(1)  | 36(1)          |
| S(2)  | 6332(2)   | 6423(2)   | 5758(1)  | 35(1)          |
| P(1)  | 7906(2)   | 7455(2)   | 3515(1)  | 35(1)          |
| N(1)  | 9111(5)   | 3345(8)   | 3733(3)  | 34(1)          |
| C(1)  | 4086(10)  | 5513(16)  | 9273(6)  | 35(1)          |
| C(2)  | 3713(15)  | 7397(18)  | 8727(8)  | 36(2)          |
| C(3)  | 4340(30)  | 7310(30)  | 7780(13) | 38(2)          |
| C(4)  | 5291(6)   | 5347(9)   | 7618(3)  | 34(1)          |
| C(5)  | 6164(6)   | 4612(9)   | 6755(4)  | 33(1)          |
| C(6)  | 6982(6)   | 2598(10)  | 6608(4)  | 33(1)          |
| C(7)  | 7759(6)   | 2495(10)  | 5697(4)  | 35(1)          |
| C(8)  | 7551(5)   | 4435(9)   | 5153(4)  | 32(1)          |
| C(9)  | 8189(6)   | 4937(9)   | 4194(4)  | 34(1)          |
| C(10) | 9640(6)   | 3995(9)   | 2820(3)  | 35(1)          |
| C(11) | 9100(6)   | 6194(9)   | 2557(4)  | 35(1)          |
| C(12) | 9515(6)   | 7043(9)   | 1624(4)  | 36(1)          |
| C(13) | 10486(7)  | 5737(10)  | 1028(4)  | 41(1)          |
| C(14) | 11025(6)  | 3551(10)  | 1317(4)  | 37(1)          |
| C(15) | 10610(6)  | 2656(10)  | 2219(4)  | 35(1)          |
| C(3A) | 5290(100) | 4000(90)  | 8460(30) | 36(1)          |
| C(2A) | 4430(70)  | 5160(100) | 9190(40) | 35(1)          |
| C(1A) | 3550(100) | 7020(130) | 8830(40) | 36(2)          |
| S(1A) | 4360(50)  | 7720(40)  | 7693(17) | 38(2)          |

**Table S3.** Bond lengths [Å] and angles [°] for 3c.

---

|                 |           |
|-----------------|-----------|
| S(1)-C(1)       | 1.725(6)  |
| S(1)-C(4)       | 1.723(5)  |
| S(2)-C(5)       | 1.730(5)  |
| S(2)-C(8)       | 1.740(5)  |
| P(1)-C(9)       | 1.745(6)  |
| P(1)-C(11)      | 1.800(5)  |
| N(1)-H(1)       | 0.8800    |
| N(1)-C(9)       | 1.353(7)  |
| N(1)-C(10)      | 1.380(6)  |
| C(1)-H(1A)      | 0.9500    |
| C(1)-C(2)       | 1.357(10) |
| C(2)-H(2)       | 0.9500    |
| C(2)-C(3)       | 1.402(14) |
| C(3)-H(3)       | 0.9500    |
| C(3)-C(4)       | 1.394(13) |
| C(4)-C(5)       | 1.451(6)  |
| C(4)-C(3A)      | 1.40(2)   |
| C(4)-S(1A)      | 1.577(19) |
| C(5)-C(6)       | 1.362(8)  |
| C(6)-H(6)       | 0.9500    |
| C(6)-C(7)       | 1.409(6)  |
| C(7)-H(7)       | 0.9500    |
| C(7)-C(8)       | 1.359(8)  |
| C(8)-C(9)       | 1.449(7)  |
| C(10)-C(11)     | 1.395(8)  |
| C(10)-C(15)     | 1.387(7)  |
| C(11)-C(12)     | 1.415(7)  |
| C(12)-H(12)     | 0.9500    |
| C(12)-C(13)     | 1.374(8)  |
| C(13)-H(13)     | 0.9500    |
| C(13)-C(14)     | 1.397(9)  |
| C(14)-H(14)     | 0.9500    |
| C(14)-C(15)     | 1.387(7)  |
| C(15)-H(15)     | 0.9500    |
| C(3A)-H(3A)     | 0.9500    |
| C(3A)-C(2A)     | 1.40(3)   |
| C(2A)-H(2A)     | 0.9500    |
| C(2A)-C(1A)     | 1.39(3)   |
| C(1A)-H(1AA)    | 0.9500    |
| C(1A)-S(1A)     | 1.75(2)   |
|                 |           |
| C(4)-S(1)-C(1)  | 92.2(3)   |
| C(5)-S(2)-C(8)  | 91.5(2)   |
| C(9)-P(1)-C(11) | 88.8(2)   |
| C(9)-N(1)-H(1)  | 122.6     |
| C(9)-N(1)-C(10) | 114.8(4)  |
| C(10)-N(1)-H(1) | 122.6     |
| S(1)-C(1)-H(1A) | 124.3     |
| C(2)-C(1)-S(1)  | 111.3(6)  |
| C(2)-C(1)-H(1A) | 124.3     |
| C(1)-C(2)-H(2)  | 123.3     |
| C(1)-C(2)-C(3)  | 113.4(9)  |
| C(3)-C(2)-H(2)  | 123.3     |

|                    |           |
|--------------------|-----------|
| C(2)-C(3)-H(3)     | 123.5     |
| C(4)-C(3)-C(2)     | 112.9(10) |
| C(4)-C(3)-H(3)     | 123.5     |
| C(3)-C(4)-S(1)     | 110.0(6)  |
| C(3)-C(4)-C(5)     | 130.5(6)  |
| C(5)-C(4)-S(1)     | 119.5(4)  |
| C(5)-C(4)-S(1A)    | 123.4(7)  |
| C(3A)-C(4)-C(5)    | 121(2)    |
| C(3A)-C(4)-S(1A)   | 116(2)    |
| C(4)-C(5)-S(2)     | 120.6(4)  |
| C(6)-C(5)-S(2)     | 111.1(3)  |
| C(6)-C(5)-C(4)     | 128.3(4)  |
| C(5)-C(6)-H(6)     | 123.4     |
| C(5)-C(6)-C(7)     | 113.2(5)  |
| C(7)-C(6)-H(6)     | 123.4     |
| C(6)-C(7)-H(7)     | 123.3     |
| C(8)-C(7)-C(6)     | 113.3(5)  |
| C(8)-C(7)-H(7)     | 123.3     |
| C(7)-C(8)-S(2)     | 110.8(3)  |
| C(7)-C(8)-C(9)     | 128.3(5)  |
| C(9)-C(8)-S(2)     | 120.9(4)  |
| N(1)-C(9)-P(1)     | 113.1(4)  |
| N(1)-C(9)-C(8)     | 119.7(5)  |
| C(8)-C(9)-P(1)     | 127.2(4)  |
| N(1)-C(10)-C(11)   | 112.4(4)  |
| N(1)-C(10)-C(15)   | 124.9(5)  |
| C(15)-C(10)-C(11)  | 122.6(5)  |
| C(10)-C(11)-P(1)   | 110.8(4)  |
| C(10)-C(11)-C(12)  | 118.2(4)  |
| C(12)-C(11)-P(1)   | 130.9(4)  |
| C(11)-C(12)-H(12)  | 120.3     |
| C(13)-C(12)-C(11)  | 119.5(5)  |
| C(13)-C(12)-H(12)  | 120.3     |
| C(12)-C(13)-H(13)  | 119.5     |
| C(12)-C(13)-C(14)  | 121.0(4)  |
| C(14)-C(13)-H(13)  | 119.5     |
| C(13)-C(14)-H(14)  | 119.6     |
| C(15)-C(14)-C(13)  | 120.8(5)  |
| C(15)-C(14)-H(14)  | 119.6     |
| C(10)-C(15)-H(15)  | 121.1     |
| C(14)-C(15)-C(10)  | 117.9(5)  |
| C(14)-C(15)-H(15)  | 121.1     |
| C(4)-C(3A)-H(3A)   | 125.4     |
| C(4)-C(3A)-C(2A)   | 109(4)    |
| C(2A)-C(3A)-H(3A)  | 125.4     |
| C(3A)-C(2A)-H(2A)  | 123.9     |
| C(1A)-C(2A)-C(3A)  | 112(5)    |
| C(1A)-C(2A)-H(2A)  | 123.9     |
| C(2A)-C(1A)-H(1AA) | 126.2     |
| C(2A)-C(1A)-S(1A)  | 108(4)    |
| S(1A)-C(1A)-H(1AA) | 126.2     |
| C(4)-S(1A)-C(1A)   | 92(2)     |

---

Symmetry transformations used to generate equivalent atoms:



**Table S4.** Anisotropic displacement parameters ( $\text{\AA}^2 \times 10^3$ ) for 3c. The anisotropic displacement factor exponent takes the form:  $-2\pi^2 [ h^2 a^{*2} U^{11} + \dots + 2 h k a^* b^* U^{12} ]$

|       | U <sup>11</sup> | U <sup>22</sup> | U <sup>33</sup> | U <sup>23</sup> | U <sup>13</sup> | U <sup>12</sup> |
|-------|-----------------|-----------------|-----------------|-----------------|-----------------|-----------------|
| S(1)  | 42(1)           | 35(1)           | 32(1)           | 3(1)            | 10(1)           | 3(1)            |
| S(2)  | 38(1)           | 34(1)           | 33(1)           | 3(1)            | 7(1)            | 5(1)            |
| P(1)  | 37(1)           | 32(1)           | 36(1)           | 1(1)            | 6(1)            | 3(1)            |
| N(1)  | 38(2)           | 33(2)           | 32(2)           | 3(2)            | 5(2)            | -2(2)           |
| C(1)  | 32(5)           | 39(4)           | 35(2)           | -2(2)           | 9(2)            | 3(2)            |
| C(2)  | 35(4)           | 33(4)           | 41(3)           | -3(2)           | 9(2)            | 0(4)            |
| C(3)  | 37(2)           | 39(6)           | 38(3)           | 1(2)            | 7(2)            | 1(5)            |
| C(4)  | 33(2)           | 37(2)           | 32(2)           | 1(2)            | 3(2)            | -2(2)           |
| C(5)  | 29(2)           | 34(2)           | 35(2)           | 0(2)            | 3(2)            | -2(2)           |
| C(6)  | 30(2)           | 34(2)           | 34(2)           | 4(2)            | 5(2)            | -1(2)           |
| C(7)  | 34(2)           | 36(2)           | 36(2)           | -2(2)           | 4(2)            | 0(2)            |
| C(8)  | 24(2)           | 35(2)           | 38(2)           | -2(2)           | 1(2)            | -2(2)           |
| C(9)  | 30(2)           | 39(3)           | 35(2)           | 3(2)            | 1(2)            | -2(2)           |
| C(10) | 30(2)           | 41(3)           | 33(2)           | -2(2)           | 2(2)            | -8(2)           |
| C(11) | 30(2)           | 33(2)           | 41(2)           | -4(2)           | 3(2)            | -2(2)           |
| C(12) | 34(2)           | 30(3)           | 45(3)           | 2(2)            | 1(2)            | -5(2)           |
| C(13) | 38(3)           | 50(3)           | 34(2)           | 7(2)            | 3(2)            | -8(2)           |
| C(14) | 36(2)           | 42(2)           | 35(2)           | -6(2)           | 9(2)            | 1(2)            |
| C(15) | 33(2)           | 36(2)           | 37(2)           | -5(2)           | 3(2)            | -2(2)           |
| C(3A) | 42(1)           | 35(1)           | 32(1)           | 3(1)            | 10(1)           | 3(1)            |
| C(2A) | 32(5)           | 39(4)           | 35(2)           | -2(2)           | 9(2)            | 3(2)            |
| C(1A) | 35(4)           | 33(4)           | 41(3)           | -3(2)           | 9(2)            | 0(4)            |
| S(1A) | 37(2)           | 39(6)           | 38(3)           | 1(2)            | 7(2)            | 1(5)            |

**Table S5.** Hydrogen coordinates ( $\times 10^4$ ) and isotropic displacement parameters ( $\text{\AA}^2 \times 10^{-3}$ ) for pro83\_0m\_a.

|        | x     | y    | z    | U(eq) |
|--------|-------|------|------|-------|
| H(1)   | 9354  | 2000 | 3995 | 41    |
| H(1A)  | 3715  | 5264 | 9919 | 42    |
| H(2)   | 3085  | 8654 | 8962 | 43    |
| H(3)   | 4147  | 8459 | 7301 | 45    |
| H(6)   | 7025  | 1384 | 7074 | 39    |
| H(7)   | 8368  | 1198 | 5484 | 42    |
| H(12)  | 9126  | 8506 | 1412 | 43    |
| H(13)  | 10794 | 6327 | 410  | 49    |
| H(14)  | 11685 | 2668 | 890  | 45    |
| H(15)  | 10978 | 1174 | 2420 | 42    |
| H(3A)  | 5800  | 2533 | 8530 | 43    |
| H(2A)  | 4452  | 4716 | 9862 | 42    |
| H(1AA) | 2665  | 7767 | 9139 | 43    |

Figure S4. Detailed packing diagram for **3c**

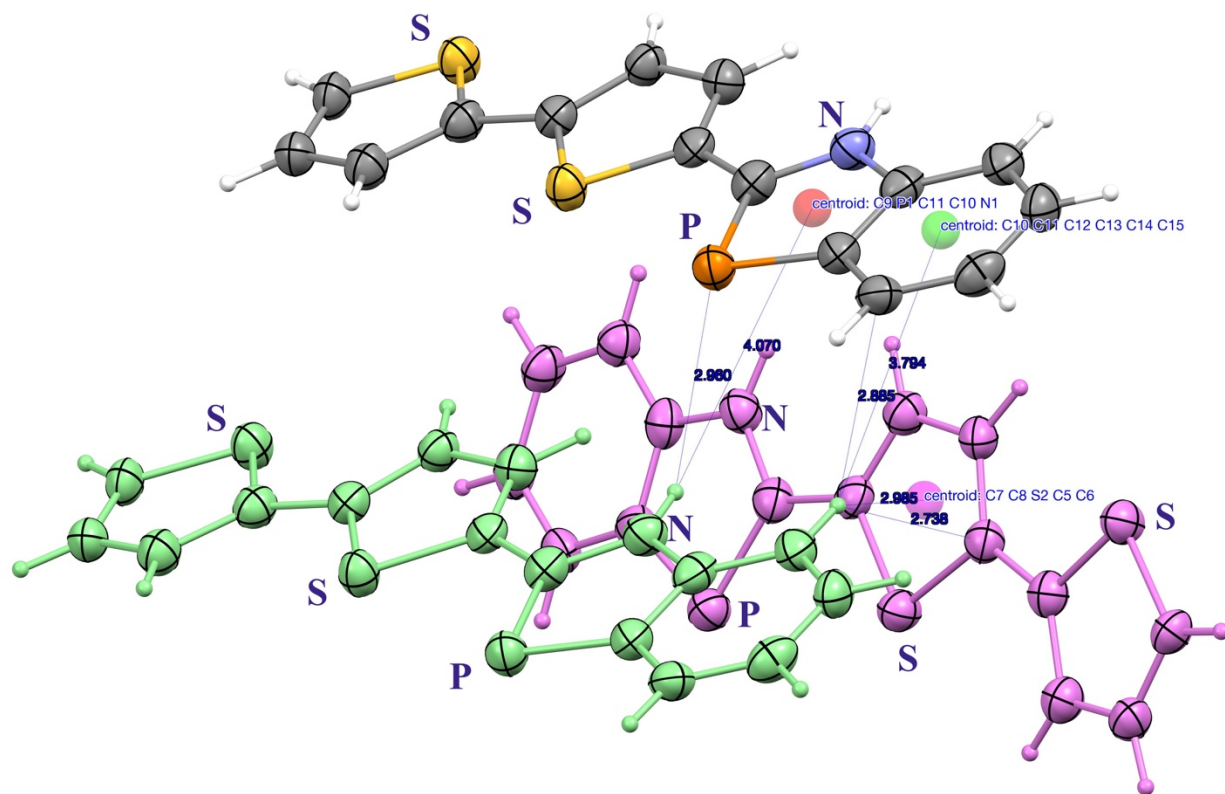

### C. Computational studies

Both the ground state and excited state geometry optimizations were performed at the  $\omega$ B97X-D/6-311++G(d,p) level of theory.<sup>1,2</sup> The S1-optimizations of **3a-3c** were performed at the B3LYP/6-311++G(d,p) level. TDDFT calculations were performed with  $\omega$ B97X-D/6-311++g(d,p) level of theory.<sup>3,4</sup> The 6-31G(d,p) basis set is used for SOC calculation. PCM with a dielectric 8.93 and refractive index 1.425 used to represent the DCM solvent. All calculations were performed using the Q-Chem 4.4 package.<sup>5</sup>

1. (a) Casida, M. E.; Gutierrez, F.; Guan, J.; Gadea, F.-X.; Salahub, D.; Daudey, J.-P. Charge-transfer correction for improved time-dependent local density approximation excited-state potential energy curves: Analysis within the two-level model with illustration for H<sub>2</sub> and LiH. *J. Chem. Phys.* 2000, 113, 7062. (b) Peach, M. J. G.; Williamson, M. J.; Tozer, D. J. Influence of triplet instabilities in TDDFT. *J. Chem. Theory Comput.* 2011, 7, 3578–3585. (c) Sears, J.S.; Koerzdoerfer, T.; Zhang, C.-R.; Bredas, J.-L. Communication: orbital instabilities and triplet states from time-dependent density functional theory and long-range corrected functionals. *J. Chem. Phys.* 2011, 135, 151103. (d) Peach, M. J. G.; Tozer, D. J. Overcoming low orbital overlap and triplet instability problems in TDDFT. *J. Phys. Chem. A* 2012, 116, 9783–9.
2. (a) Chai, J.-D.; Head-Gordon, M. Systematic optimization of long-range corrected hybrid density functionals. *J. Chem. Phys.* 2008, 128, 084106. (b) Chai, J.-D.; Head-Gordon, M. Long-range corrected hybrid density functionals with damped atom-atom dispersion corrections. *Phys. Chem. Chem. Phys.* 2008, 10, 6615–20. (c) Chai, J.-D.; Head-Gordon, M. Long-range corrected hybrid density functionals with damped atom-atom dispersion corrections. *Chem. Phys. Lett.* 2008, 467, 176–178.
3. Closser, C. D.; Gessner, O.; Head-Gordon, M. Simulations of the dissociation of small helium clusters with ab initio molecular dynamics in electronically excited states. *J. Chem. Phys.* 2014, 140, 134306.
4. Ou, Q.; Subotnik, J. E. Electronic relaxation in benzaldehyde evaluated via TD-DFT and localized diabaticization: intersystem crossings, conical intersections, and phosphorescence. *J. Phys. Chem. C* 2013, 117, 19839–19849.
5. Shao, Y.; et al. Advances in molecular quantum chemistry contained in the Q-Chem 4 program package. *Mol. Phys.* 2015, 113, 184–215.

**Table S6.** Optimized cartesian coordinates of **3a**

|   |                     |                     |                     |
|---|---------------------|---------------------|---------------------|
| C | 0.3855210296362960  | 0.2341745719594957  | 0.0438285590374763  |
| N | -0.3869444278502195 | -0.8639546851357215 | -0.1368658901045878 |
| C | -1.745555018688815  | -0.6376135297122917 | -0.0664822727317680 |
| C | -2.7553617092000637 | -1.5909237818017543 | -0.2132842334319362 |
| C | -4.0680482041798554 | -1.1689072122274402 | -0.1170261590890490 |
| C | -4.4010837309758806 | 0.1783452627515053  | 0.1275973050926884  |
| C | -3.3815085633776163 | 1.1073032921083907  | 0.2722119192536871  |
| C | -2.0369025107954073 | 0.7168245595984266  | 0.1805201005134812  |
| P | -0.5235532661337633 | 1.6773172016936222  | 0.3205798997970258  |
| H | -2.5120747315434144 | -2.6308809602838923 | -0.4034914294102077 |
| H | -4.8642036786674332 | -1.8968808234191041 | -0.2364690291300946 |
| H | -3.6289777710866424 | 2.1490621331534321  | 0.4578565392366876  |
| H | 0.0022007109499794  | -1.7824925341146303 | -0.2990452582147927 |
| C | 1.8723690245930507  | 0.0878323527172287  | -0.0102072786592521 |
| H | 2.3594480985693451  | 1.0439351746297041  | 0.1816934900978714  |
| H | 2.2125950830790146  | -0.6335719801728986 | 0.7387788177074414  |
| H | 2.1933873219564695  | -0.2725757424231780 | -0.9923223572963177 |
| C | -5.8440057302682167 | 0.6098824632147849  | 0.2204161319098970  |
| H | -6.0739105843758523 | 1.0102242452569317  | 1.2122823944019006  |
| H | -6.0654931081031576 | 1.3944468328013049  | -0.5082455452198049 |
| H | -6.5222829103577160 | -0.2244739405939334 | 0.0306964562396594  |

**Table S7.** Optimized cartesian coordinates of **3b**

|   |                     |                     |                     |
|---|---------------------|---------------------|---------------------|
| C | 4.1742508895624404  | -1.0704723995286021 | -0.1206933805569141 |
| C | 4.3821429106947560  | 0.3110924230849167  | 0.0536845068365042  |
| C | 3.3137879879302425  | 1.1778935831288690  | 0.1727919188855782  |
| C | 2.0006409312999369  | 0.6773851334405510  | 0.1159283267748042  |
| P | 0.4259887771191200  | 1.5238440595003322  | 0.2309069026626301  |
| C | -0.3697186246034898 | -0.0019353492698476 | 0.0145554989638813  |
| C | -1.8034092007479656 | -0.2578658681165137 | -0.0194573277826236 |
| C | -2.4702158544171402 | -1.4131309754850241 | 0.2987175096517203  |
| C | -3.8811754541456334 | -1.2961647996292744 | 0.1675972396599526  |
| C | -4.2695789613385697 | -0.0581966407546132 | -0.2490142707872009 |
| S | -2.9219850527877487 | 0.9827816171739037  | -0.4972328105308519 |
| N | 0.4892251560893004  | -1.0481364842754577 | -0.1105627447176494 |
| H | 0.1811823246494920  | -1.9942861340161588 | -0.2866498688645339 |
| C | 1.8197822929730221  | -0.7076088609377732 | -0.0594822633050331 |
| C | 2.8983352002074239  | -1.5927661763881424 | -0.1771968394855576 |
| H | 5.0259121950894965  | -1.7346272135632734 | -0.2162084735534479 |
| H | 5.3946504161265780  | 0.6971938699718897  | 0.0883828733093968  |
| H | 3.4821317115256170  | 2.2419977453072470  | 0.3031426075197473  |
| H | -1.9778663872235855 | -2.3125164158452955 | 0.6469912203332294  |
| H | -4.5781033089690801 | -2.095504877755336  | 0.3815408701197917  |
| H | -5.2694831276527383 | 0.3104456634111345  | -0.4253555015797146 |
| H | 2.7299113323735225  | -2.6561832836561514 | -0.3096170423421686 |

**Table S8.** Optimized cartesian coordinates of **3c**

|   |                     |                    |                     |
|---|---------------------|--------------------|---------------------|
| C | 3.8827053185385534  | 0.0236380772950766 | 1.8589274715411219  |
| C | 4.2582899294537091  | 0.8717441661386001 | 0.7995560911340603  |
| C | 3.3320169510366244  | 1.2815789464127734 | -0.1385566775278743 |
| C | 1.9952244350377777  | 0.8562064855750227 | -0.0325149428231743 |
| P | 0.5712006704107708  | 1.2364787344043242 | -1.0503524457723252 |
| C | -0.3970074783647743 | 0.2642446108190047 | 0.0089307150160573  |

C -1.8340187842128846 0.0319104870752937 -0.0493993634147226  
 C -2.7091117313492488 -0.0884390233446153 0.9976023488673390  
 C -4.0476747222094538 -0.3061289530034249 0.5849183919292492  
 C -4.1916305744685483 -0.3517870910977945 -0.7761640431437650  
 S -2.6624847761976440 -0.1166584284806132 -1.5674416360496612  
 N 0.3040518602108033 -0.2863477415727287 1.0359026139095187  
 H -0.1175182544443614 -0.9087020012362541 1.7115301197742945  
 C 1.6421803147904697 0.0230856398691283 1.0456934543593712  
 C 2.5795862860855476 -0.4083506620122673 1.9928285417080565  
 H 4.6266642298731853 -0.2848704784709423 2.5848493285876870  
 H 5.2854905476749261 1.2113938900370331 0.7289037680225209  
 H 3.6272919806272714 1.9389318280905794 -0.9497346752823909  
 H -2.4008233959777616 -0.0145029477553393 2.0329602544659875  
 H -4.8711411596972019 -0.4436021641088093 1.2739461060113326  
 H 2.2824926053345735 -1.0613654305655966 2.8060648267233619  
 C -5.4014012102574256 -0.5781682407901498 -1.5551816990027081  
 C -5.5292068622664416 -1.2125959551847321 -2.7617906188057977  
 S -6.9484079480753618 -0.0209477782694347 -0.9875888113187494  
 C -6.8724932029578678 -1.2604299219187538 -3.2286891906376232  
 H -4.6896686363839972 -1.6531004353376753 -3.2853155782608345  
 C -7.7475874401929072 -0.6662388914375699 -2.3709416345019649  
 H -7.1755850017667955 -1.7254724651746882 -4.1573737595497740  
 H -8.8198936602514806 -0.5710630559554366 -2.4615341059586000

**Table S9.** Optimized cartesian coordinates of **3a** (S1 state)

C 0.4548263286232766 0.1780124249956259 -0.0039001193591396  
 N -0.3706959352767319 -0.8578171888903392 -0.0737484534036312  
 C -1.7570384816785627 -0.6204069556937674 -0.0219754512839401  
 C -2.7510041926340145 -1.6200719453935917 -0.0916861634293967  
 C -4.1048859310785337 -1.1741439392493420 -0.0193298307628055  
 C -4.4403745159563011 0.1593862162996952 0.1085601363098407

|   |                     |                     |                     |
|---|---------------------|---------------------|---------------------|
| C | -3.4071475455157763 | 1.1576270479076833  | 0.1725940458957831  |
| C | -2.0601616721111182 | 0.7433651519383399  | 0.1068794847813218  |
| P | -0.5488122682441465 | 1.7260330817074683  | 0.1631259100972554  |
| H | -2.4981314637988423 | -2.6648061148687008 | -0.1945688223473842 |
| H | -4.8948189835976521 | -1.9129277042645163 | -0.0661383095975571 |
| H | -3.6616843898619069 | 2.2042034994613608  | 0.2732869725170949  |
| H | -0.0167677914042238 | -1.8095713962970268 | -0.1609028482223482 |
| C | 1.9322329345264260  | 0.0660980098522095  | -0.0420071551761225 |
| H | 2.3805378099340158  | 0.4935592440436720  | 0.8681874356237150  |
| H | 2.2534665121944468  | -0.9761551049226133 | -0.1323527807061546 |
| H | 2.3466075053893638  | 0.6363095395560223  | -0.8876628775539465 |
| C | -5.8785567727690617 | 0.6000648557024452  | 0.1851767212911082  |
| H | -6.0830126430351239 | 1.1205676308449748  | 1.1271635019970132  |
| H | -6.1191235472606547 | 1.3049060623312398  | -0.6179978464046501 |
| H | -6.5598401164448159 | -0.2471595150608435 | 0.1103186097339627  |

**Table S10.** Optimized cartesian coordinates of **3b** (S1 state)

|   |                     |                     |                     |
|---|---------------------|---------------------|---------------------|
| C | 4.2083065692163970  | -1.0270994269788931 | -0.0031844366682554 |
| C | 4.3814534864653192  | 0.3617307469990644  | -0.0026056344715105 |
| C | 3.2831486852382121  | 1.2111538553454688  | -0.0033011532815040 |
| C | 1.9810052974574051  | 0.6772075921260370  | -0.0041652438863120 |
| P | 0.4118023510972105  | 1.5147492407420065  | -0.0066073362714013 |
| C | -0.4066887397541911 | -0.1401915166668960 | -0.0043202995923764 |
| C | -1.7745014886307742 | -0.3367785823816693 | -0.0005580982223314 |
| C | -2.5402099089696422 | -1.5291308242135924 | 0.0078472434201733  |
| C | -3.9098419864125287 | -1.2762526104296619 | 0.0116579929644079  |
| C | -4.2372210315738634 | 0.0713170479784151  | 0.0062982049865780  |
| S | -2.8461790778396368 | 1.0810490793664411  | -0.0038842604972415 |
| N | 0.5127808206658225  | -1.1408765940653731 | -0.0049452041429378 |
| H | 0.2606199086047513  | -2.1191829524728210 | -0.0056809629115012 |
| C | 1.8375541494229102  | -0.7336305688136143 | -0.0042579870074657 |



|   |                     |                     |                     |
|---|---------------------|---------------------|---------------------|
| C | 2.9320856829683000  | -1.5889834731314676 | -0.0040082949658494 |
| H | 5.0750340791360413  | -1.6806517346908523 | -0.0029809818473473 |
| H | 5.3843182500415834  | 0.7756678302896851  | -0.0017965146255034 |
| H | 3.4212435443042080  | 2.2881025689944665  | -0.0029653670042511 |
| H | -2.1048601432858720 | -2.5181719544262036 | 0.0106996895592957  |
| H | -4.6657065081977773 | -2.0505467367766301 | 0.0184424305749839  |
| H | -5.2237017906610745 | 0.5092946273721372  | 0.0074869466029474  |
| H | 2.7959640044622147  | -2.6655369983888511 | -0.0044017815010628 |

**Table S11.** Optimized cartesian coordinates of **3c** (S1 state)

|   |                     |                     |                     |
|---|---------------------|---------------------|---------------------|
| C | 3.8635167078227473  | 0.4353559508879213  | 1.9111685445140709  |
| C | 4.2610623626492243  | 0.7503583349643175  | 0.6006070584224743  |
| C | 3.3350457926186658  | 0.7747926147500799  | -0.4265466776092118 |
| C | 1.9825635286266394  | 0.4857882639964865  | -0.1613007666707854 |
| P | 0.5993328105171866  | 0.4325897030295581  | -1.2740721717961465 |
| C | -0.4565905274941039 | 0.0043105784191315  | 0.1287101527361812  |
| C | -1.8247119275864383 | -0.2140163563229729 | 0.0621447721569997  |
| C | -2.7568909758621380 | -0.5126067404403191 | 1.0926827350253880  |
| C | -4.0404269847316021 | -0.6717702840285258 | 0.6310815082789563  |
| C | -4.1774177946051090 | -0.5130643851631793 | -0.7689868978069030 |
| S | -2.6396069537817199 | -0.1363698020783276 | -1.5076293656702273 |
| N | 0.2589206883351521  | -0.0742839097259638 | 1.2947881543933393  |
| H | -0.1559322605034936 | -0.3004851891375433 | 2.1869395598727657  |
| C | 1.6064484730093709  | 0.1797460882730928  | 1.1703888105736051  |
| C | 2.5387050746976971  | 0.1504039810376159  | 2.2087317463449199  |
| H | 4.6044224031230847  | 0.4148472276546977  | 2.7039761492288261  |
| H | 5.3030468596313085  | 0.9732078748162041  | 0.3958805835741313  |
| H | 3.6484993964479320  | 1.0193406475994138  | -1.4369221789432201 |
| H | -2.4736315475707125 | -0.5931216852197293 | 2.1333983765276994  |
| H | -4.8822025972052128 | -0.9017970239531766 | 1.2721379775977042  |
| H | 2.2263413985025822  | -0.0950981528242549 | 3.2185285189964028  |

C -5.3516735546199836 -0.6316970952054763 -1.5432853958805002  
C -5.4916820641441495 -0.5425054643168997 -2.9277172172713364  
S -6.9169521917064953 -0.9223160341711052 -0.7992849919680376  
C -6.8220127389345198 -0.7056961556700817 -3.3610122851161366  
H -4.6590910478881309 -0.3703974551699770 -3.5974703514602595  
C -7.7035875130974629 -0.9168499407727978 -2.3334931006270718  
H -7.1312897440399690 -0.6735638120043069 -4.3976788145361372  
H -8.7726647822103168 -1.0646605792238681 -2.3857295828875063

Figure S5. Comparison of key calculated bond distances in ground state and first excited states of **3b** and **3c**

BLUE = Ground State Results  
RED = Excited State Results

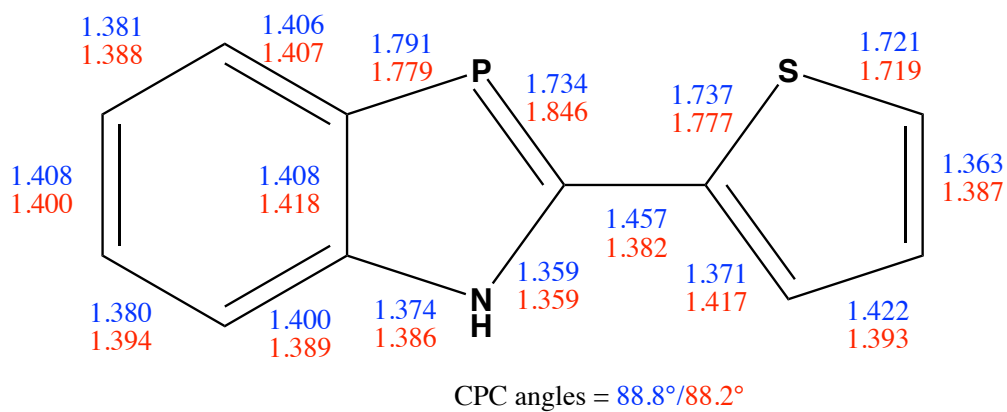

**3b**

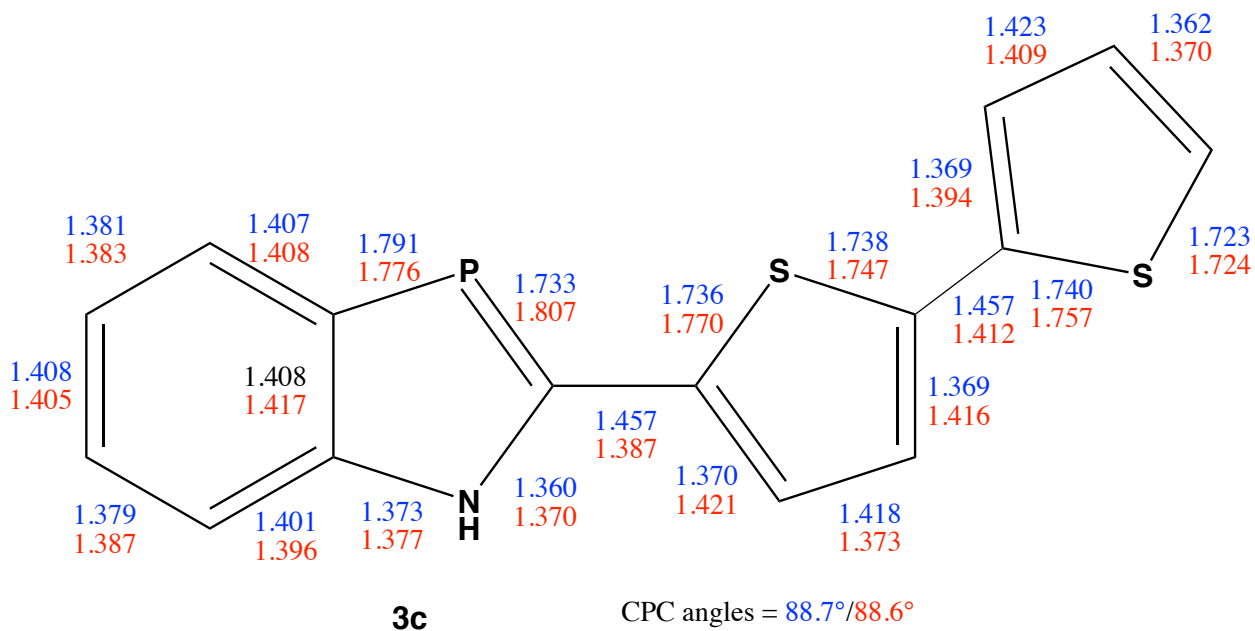

**3c**

Figure S6. (a) UV-vis spectra as a function of concentration (b) plot of Abs vs concentration for **3b** in CH<sub>2</sub>Cl<sub>2</sub>

(a)

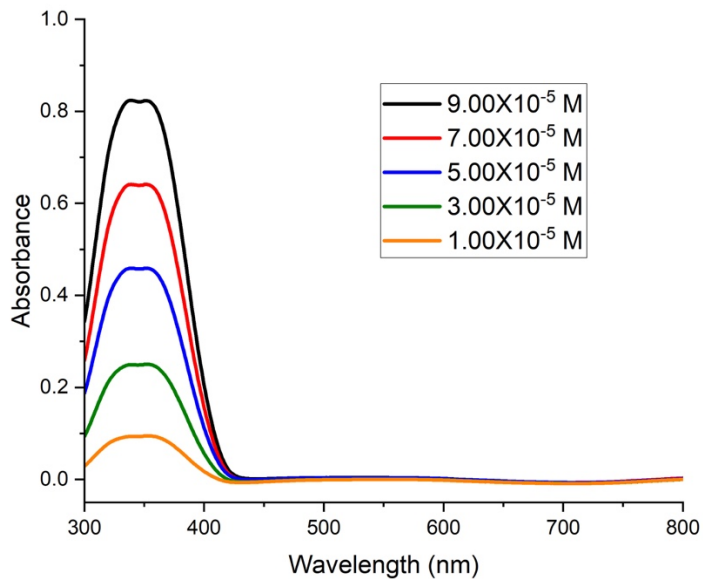

(b)

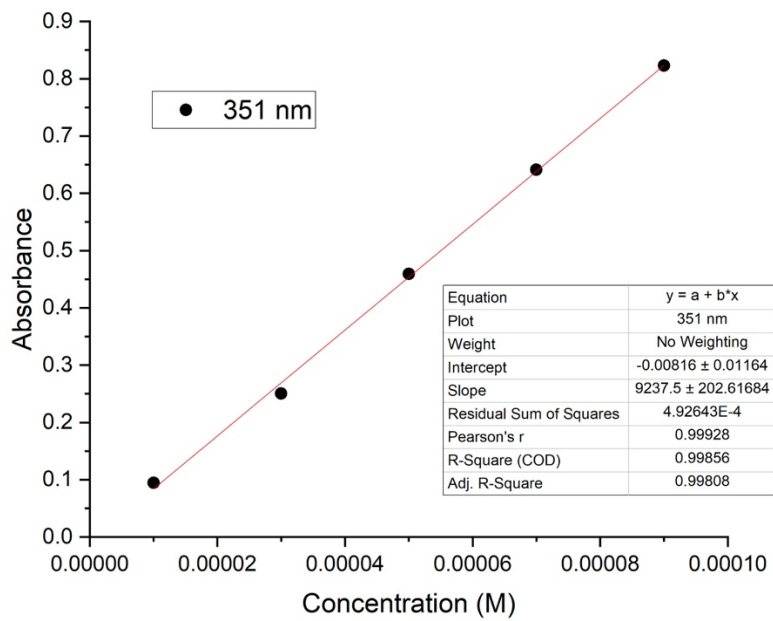

**Figure S7.** (a) UV-vis spectra as a function of concentration (b) plot of Abs vs concentration for **3c** in CH<sub>2</sub>Cl<sub>2</sub>

(a)

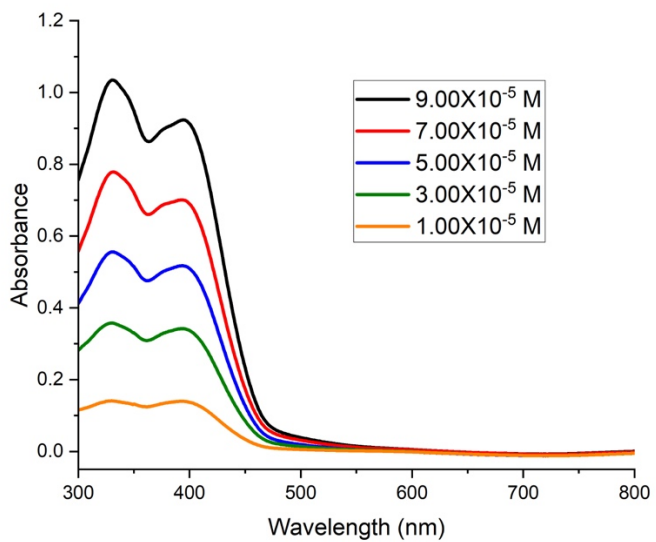

(b)

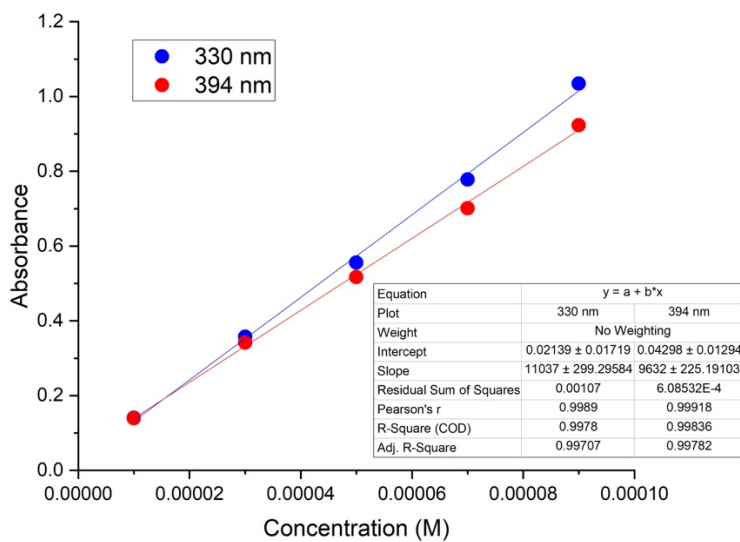

**Figure S8.** (a) Excitation and emission spectra for **3b** (b) Excitation and emission spectra for **3c** in CH<sub>2</sub>Cl<sub>2</sub>

(a)

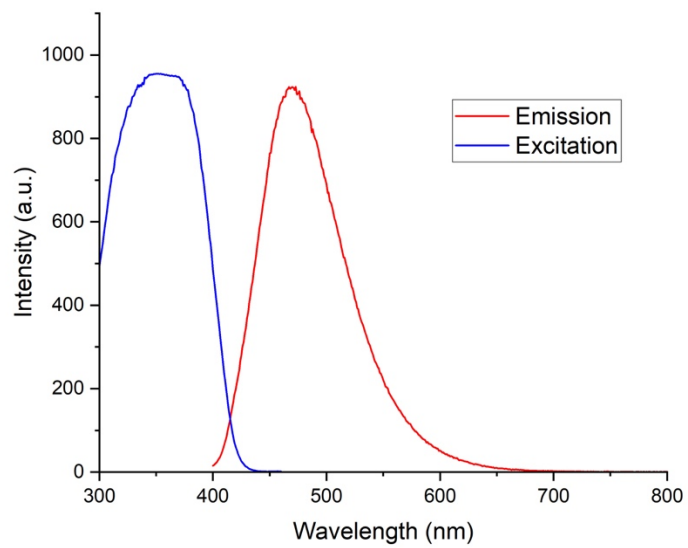

(b)

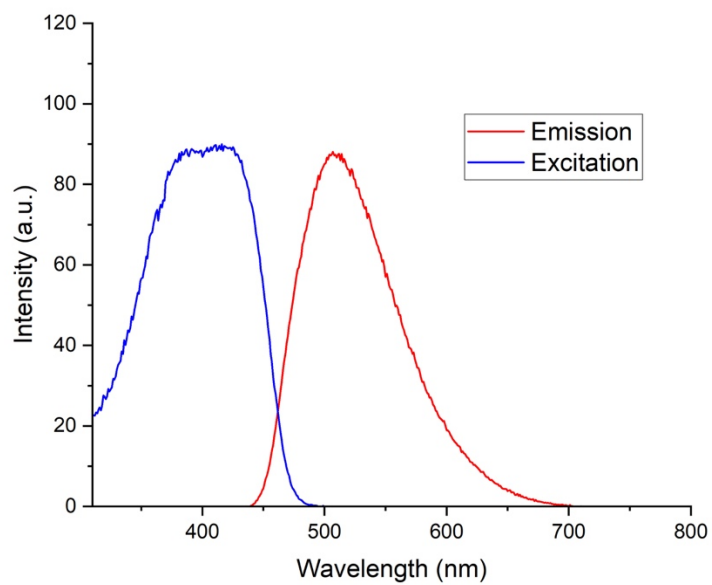

**Figure S9.** (a) Fluorescence spectra as a function of concentration for **3b** (b) plot of Fluorescence intensity vs concentration for **3b** in CH<sub>2</sub>Cl<sub>2</sub>

(a)

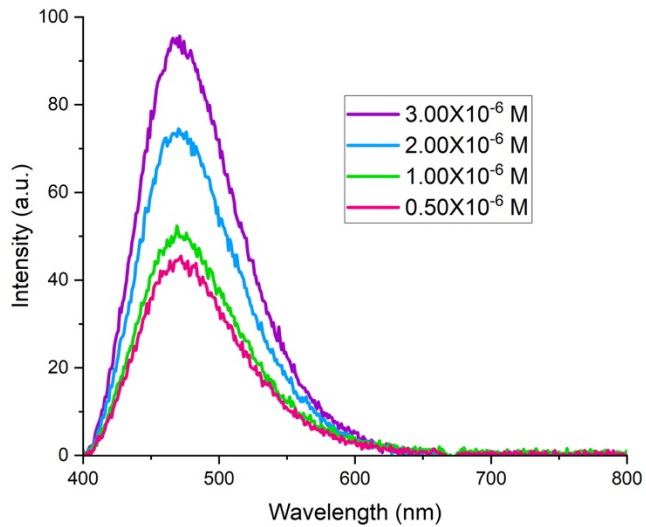

(b)

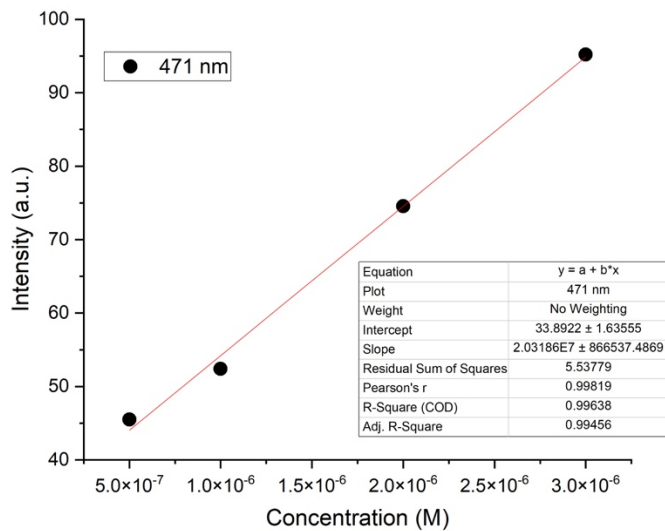

**Figure S10.** (a) Fluorescence spectra as a function of concentration for **3c** (b) plot of Fluorescence intensity vs concentration for **3c** in CH<sub>2</sub>Cl<sub>2</sub>

(a)

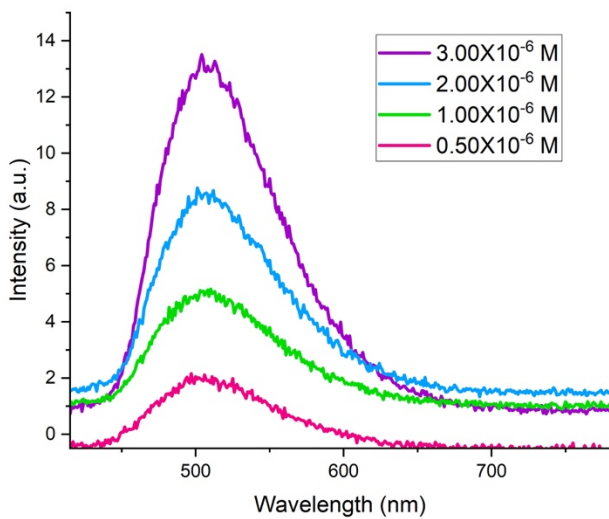

(b)

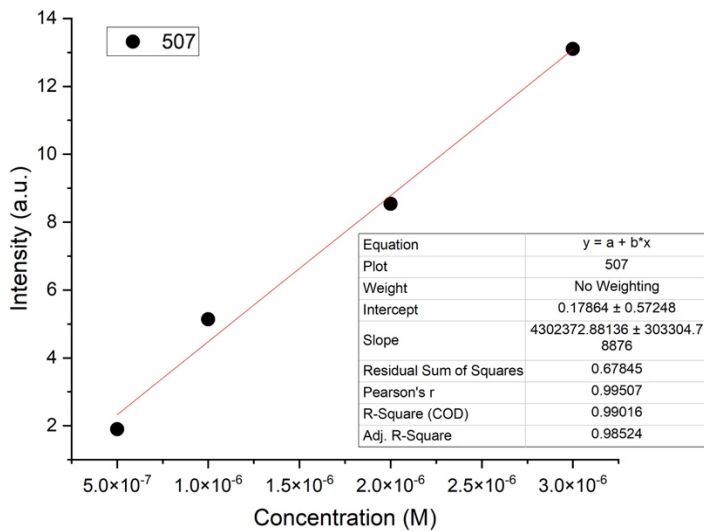



**Figure S11.** Fluorescence spectra for **3c** in different solvents (normalized).

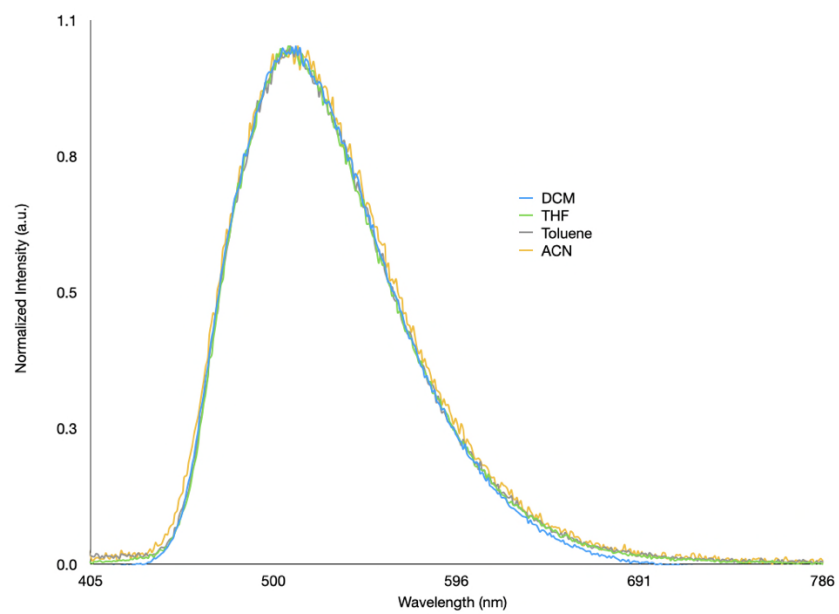

## Lifetime Measurements

**Physical Methods.** To exclude air, all samples were prepared in a nitrogen-filled glovebox, and kept under nitrogen until immediately before measurement. Fluorescence lifetimes were recorded in deoxygenated dichloromethane in screw-capped 1 cm quartz cuvettes using a Horiba DeltaFlex Lifetime System, using 330 nm pulsed diode excitation sources.

**Figure S12 (a). Compound 3b** Lifetime ( $\tau$ ): 7.4 ns

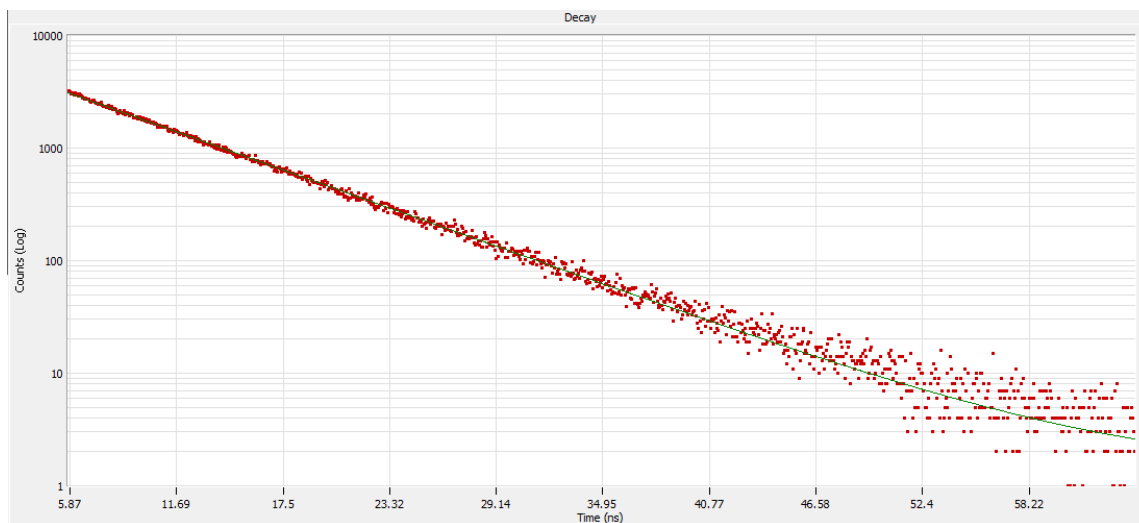

**Figure S12 (b). Compound 3c** Lifetime ( $\tau$ ): 1.7 ns (bi-exp;  $9.0 \times 10^{-10}$  s (83.58%) &  $3.0 \times 10^{-9}$  s (16.42%))

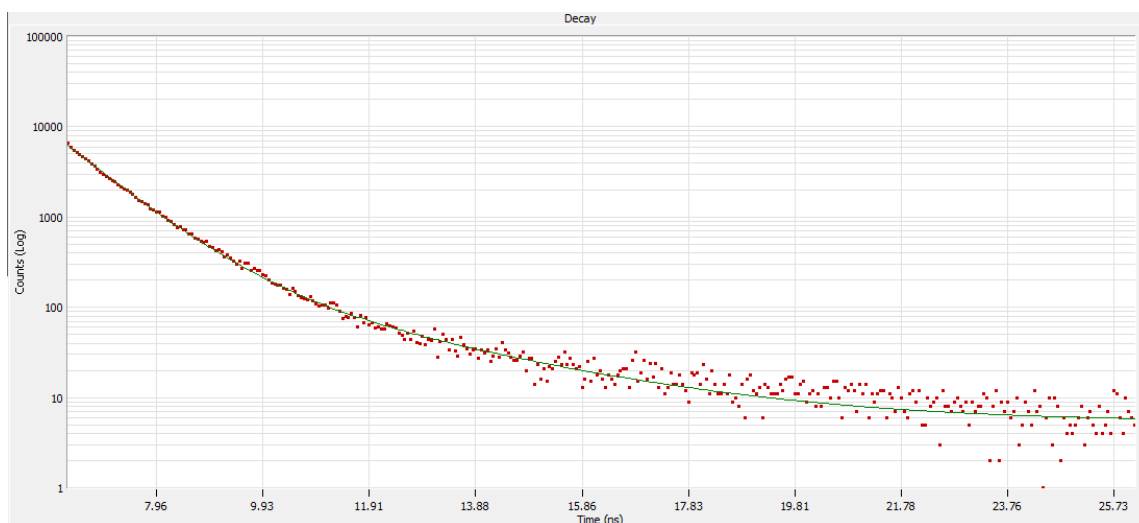

Supplement: d2ra07226b1.pdf [file d2ra07226b1.pdf]
